# 1 Oral microbial dysbiosis linked to worsened periodontal condition in rheumatoid

## 2 arthritis patients

3 **Short title:** Oral microbial dysbiosis and arthritis

4  
5 Joice Dias CORRÊA<sup>1</sup>, Gabriel R. FERNANDES<sup>2</sup>, Débora Cerqueira CALDERARO<sup>3</sup>, Santuza  
6 Maria Souza MENDONÇA<sup>1</sup>, Janine Mayra Silva<sup>1</sup>, Mayra Laino ALBIERO<sup>4</sup>, Fernando Q  
7 CUNHA<sup>5</sup>, E XIAO<sup>6</sup>, Gilda Aparecida FERREIRA<sup>3</sup>, Antônio Lúcio TEIXEIRA<sup>3</sup>, Chiranjit  
8 MUKHERJEE<sup>7</sup>, Eugene J. LEYS<sup>7</sup>, Tarcília Aparecida SILVA<sup>1¶</sup>, Dana T. GRAVES<sup>6¶\*</sup>

9  
10 1. Faculty of Dentistry, Federal University of Minas Gerais, Belo Horizonte - MG, Brazil.

11 2. Oswaldo Cruz Foundation, René Rachou Research Center, Belo Horizonte - MG, Brazil.

12 3. University Hospital, Federal University of Minas Gerais, Belo Horizonte - MG, Brazil.

13 4. Faculty of Dentistry, University of Campinas, Piracicaba – SP, Brazil.

14 5. Faculty of medicine of Ribeirão Preto, University of São Paulo – SP, Brazil.

15 6. Penn Dental School, University of Pennsylvania, Philadelphia – PA, USA.

16 7. The Ohio State University, College of Dentistry, Columbus - OH, USA.

17 ¶ The two senior authors contributed equally to this publication

18  
19 \*Corresponding author:

20 E-mail: [dtgraves@upenn.edu](mailto:dtgraves@upenn.edu) (DG)

## 22 Abstract

23 Rheumatoid arthritis (RA) is an autoimmune disorder associated with increased  
24 periodontal destruction. It is thought that RA increases the risk of periodontal disease; it is not  
25 known how it influences the oral microbiota. Our aim was to analyze the impact of RA on  
26 subgingival microbiota and its association with periodontal inflammation and RA activity.  
27 Forty-two patients with RA were compared to 47 control subjects without RA. Patients were  
28 screened for probing depth, clinical attachment level, bleeding on probing and classified as with  
29 or without periodontitis. Subgingival plaque was examined by Illumina MiSeq Sequencing of  
30 16S rRNA gene V4 region and inflammatory cytokines were measured in saliva. RA was  
31 associated to severe periodontal disease. In addition, the severity of RA, reflected by the number  
32 of tender and swollen joints, was significantly correlated with the presence of pathogenic oral  
33 bacteria (i.e. *Fusobacterium nucleatum* and *Treponema socransky*). Non-periodontitis RA  
34 patients compared to healthy controls had increased microbial diversity and bacterial load,  
35 higher levels of pathogenic species (*Prevotella*, *Selenomonas*, *Anaeroglobus geminatus*,  
36 *Parvimonas micra*, *Aggregatibacter actinomycetemcomitans*) and reduction of health-related  
37 species (*Streptococcus*, *Rothia aeria*, *Kingella oralis*). Genes involved with bacterial virulence  
38 (i.e. lipopolysaccharide biosynthesis, peptidases) were more prevalent in the subgingival  
39 metagenome of subjects with RA. In addition, the degree of oral inflammation reflected by  
40 IL-2, IL-6, TNF- $\alpha$ , IFN- $\gamma$  salivary levels was increased in non-periodontitis RA patients in  
41 comparison with controls. Our findings support the hypothesis that RA triggers dysbiosis of  
42 subgingival microbiota, which may contribute to worsening periodontal status.

43

44

45

46

## 47 **Author Summary**

48 Rheumatoid arthritis (RA) is an autoimmune disease characterized by joints inflammation,  
49 swelling, pain and stiffness. Exactly what starts this disease is still unclear. Some recent studies  
50 have suggested mucosal surfaces in the body, like those in the gums, could affect the disease  
51 process. It has been observed that people with RA have higher risk of periodontitis (a bacterial  
52 inflammatory disease of the gums), compared with the general population, and this may be the  
53 start of the autoimmune process. Also, periodontitis increases the severity of RA while  
54 interventions by treating periodontitis can improve the symptoms of RA. One of the possible  
55 mechanisms that link the higher prevalence of periodontitis in RA patients is the dysbiosis of  
56 the oral microbiota triggered by the chronic inflammation in RA. Increased levels of molecules  
57 of inflammation may affect the oral environment and change the type of bacteria that live there.  
58 Here, we examined RA patients and healthy subjects, screening their oral health and  
59 inflammatory markers. We collected their saliva and the dental plaque from the space between  
60 the teeth and the gum. We found that RA patients exhibited severe periodontitis, increased  
61 levels of inflammatory mediators on their saliva and distinct bacterial communities, with higher  
62 proportions of bacteria species linked to periodontal disease, even in patients without  
63 periodontitis. We also found that the presence of these bacteria species was linked to worse RA  
64 conditions. Our study provides new insights to understand the bi-directional mechanisms  
65 linking periodontal disease to the development of RA, showing that we need to pay attention to  
66 the oral cavity in patients with RA and refer people for dental evaluation. This practice might  
67 have a positive impact in the course of RA.

68

69 **KEYWORDS:** Oral Microbiota; Arthritis; Subgingival dental plaque, Dysbiosis.

## 71                    **Introduction**

72                    The oral cavity is the second largest microbial niche after the gastrointestinal tract with  
73                    over 700 bacterial species [1]. In periodontally healthy individuals, microbial populations co-  
74                    exist in equilibrium with the host. The change in this equilibrium is linked to the pathogenesis  
75                    of oral diseases such as periodontitis [1]. Oral bacteria, which exist as a biofilm on the tooth  
76                    surface, can induce inflammation in the adjacent gingiva, leading to osteoclast formation and  
77                    bone loss which, in severe cases causes tooth loss [2]. Systemic inflammatory diseases may  
78                    contribute to disrupting the balance between host and oral microbiota [3].

79                    Rheumatoid arthritis (RA) is a systemic autoimmune disease characterized by chronic  
80                    inflammation and damage to soft and hard articular tissues [5]. An increased incidence of  
81                    periodontitis has been reported in patients with RA [6]. Furthermore, treatment of periodontitis  
82                    has been shown to reduce RA activity [7]. A link between periodontal disease and RA involves  
83                    the production of enzymes capable of modifying proteins to enhance their antigenicity by the  
84                    addition of malondialdehyde-acetaldehyde, citrullination and carbamylation [8]. Furthermore,  
85                    RA enhance systemic inflammation which can amplify the local inflammatory response in the  
86                    periodontium, increasing periodontal destruction [9].

87                    Few studies have described the composition of the oral microbiota in patients with RA  
88                    [10–13]. Zhang examined dental and salivary microbiome but the periodontal status of RA  
89                    subjects was not defined [11]. Another study evaluated subgingival microbiota and the  
90                    periodontal condition of RA subjects, but it did not evaluate the impact of RA and periodontitis  
91                    independently [10]. Mikuls compared RA to Osteoarthritis patients [12] while Lopez-Oliva  
92                    analyzed only RA patients without periodontitis [13]. Furthermore, neither of these studies  
93                    assessed inflammatory parameters in the oral cavity. Our study characterized the subgingival  
94                    microbiome of RA patients and its association with periodontal status, inflammatory markers  
95                    and RA scores to establish a link between these parameters.

96

97

## 98 **Results**

### 99 **Periodontal destruction and RA outcomes**

100           Of the 42 patients with RA included in the study, 50% had periodontitis compared to  
101 42.6% of the controls ( $P>0.05$ ). The mean duration of RA was similar for patients without  
102 periodontitis ( $16.18\pm 8.2$  years) and for those with periodontitis ( $12.46\pm 9.7$  years) ( $P>0.05$ ). RA  
103 activity parameters (number of tender and swollen joints, DAS-28) and medications in use were  
104 not different between RA patients with or without periodontitis (Table 1). Of note, the majority  
105 of RA subjects (85.7%) with periodontitis were positive for the presence of autoantibodies  
106 (ACPA) compared to only 33% in RA patients without periodontitis ( $P<0.05$ ).

107           The presence of RA was associated with worse periodontal parameters compared with  
108 control subjects: probing depth (Controls 3.0 x RA 3.8 mm) and clinical attachment loss  
109 (Controls 3.0 x RA 4 mm) (Table 1). These data indicate severe periodontitis in RA patients  
110 although self-reported hygiene habits and plaque index did not differ among RA and control  
111 subjects.

112

113

114

**Table 1 – Demographic and clinical data of patients with RA and healthy control subjects.**

|                                  | Controls     |              | RA           |                |
|----------------------------------|--------------|--------------|--------------|----------------|
|                                  | Non-CP       | CP           | Non-CP       | CP             |
| Subjects                         | 27(57.4%)    | 20(42.6%)    | 21(50%)      | 21(50%)        |
| Females %                        | 36.5         | 48           | 53.48        | 34             |
| Age, years                       | 42.8(±14.0)  | 46.5(±12.3)  | 50(±11.1)    | 53(±10.40)     |
| Current Smokers                  | 1(3.7%)      | 2(7.6%)      | 1(4.6%)      | 1(4.6%)        |
| RA duration, years               | n/a          | n/a          | 16.2(±8.2)   | 12.5(±9.7)     |
| <b>Disease active parameters</b> |              |              |              |                |
| Tender joints                    | n/a          | n/a          | 3.2(±4.0)    | 3.3(±4.6)      |
| Swollen joints                   | n/a          | n/a          | 2.5(±0.5)    | 2.4(±0.9)      |
| DAS28                            | n/a          | n/a          | 3.5(±1.2)    | 3.7(±1.5)      |
| <b>Autoantibody status</b>       |              |              |              |                |
| ACPA positive, %                 | n/a          | n/a          | 7(33%)       | 85.7*          |
| <b>Medications</b>               |              |              |              |                |
| Methotrexate                     | n/a          | n/a          | 11(52.4%)    | 14(66.7%)      |
| Prednisone                       | n/a          | n/a          | 9(42.9%)     | 14(66.7%)      |
| Biological agent                 | n/a          | n/a          | 5(23.8%)     | 4(19.0%)       |
| <b>Periodontal parameters</b>    |              |              |              |                |
| PD (mm)                          | 1.9(1.6-2.2) | 3.0(3-3.7)*  | 2.9(2-3)#    | 3.8(3.4-4.5)** |
| CAL (mm)                         | 2.2(2-3)     | 3.0(2.6-3.5) | 3.0(2.9-3.4) | 4.0(3.7-5.3)** |
| BOP (% sites)                    | 6(1.2-16)    | 6.7(2.7-13)  | 5(3.8-7.7)   | 7(5-14)        |
| Missing teeth                    | 2(0-6)       | 4(1-7)       | 6(2.5-11)#   | 6(3-10)        |
| Plaque Index                     | 0.5(0.1-1)   | 0.5(0.3-0.8) | 0.5(0.2-0.7) | 0.58(0.23-1.1) |
| Tooth brushing (times/day)       | 2.85(±0.93)  | 2.62(±0.85)  | 2.82(±0.5)   | 2.69(±0.6)     |

Values were expressed in mean ± SD or median (25% percentile-75% percentile)

CP: Chronic Periodontitis, BOP: bleeding upon probing, PD probing depth, CAL clinical attachment level, DAS28: Disease Activity Score, ACPA anti-citrullinated protein antibody.

\*Statistically different comparing Non-CP x CP within the same group

# Statistically different comparing RA x Healthy Control group

One Way ANOVA or Kruskal-Wallis test, p<0.05

116 **RA affects subgingival microbial load, richness and diversity**

117 We investigated the total microbial biomass in RA subjects and found that non-  
118 periodontitis RA patients had a significantly ~1 log higher bacterial burden than did control  
119 individuals without periodontitis (Fig 1A). A total of 779 OTUS were found and the impact of  
120 RA status on microbial diversity and richness was examined by assessing the number of  
121 observed OTUs, Chao1 and Shannon indexes. RA patients had increased microbial diversity  
122 compared to controls, both without periodontitis. In subjects with periodontitis, RA was  
123 associated with increased diversity assessed by number of OTUs (Fig 1C) and Shannon Index  
124 (Fig 1D). Thus, RA was associated with an increased diversity like that one observed in control  
125 patients with periodontitis compared to control patients without periodontitis (Fig 1B and 1C).

126 To analyze whether the subgingival microbial communities in patients with RA were  
127 distinct from that of controls, we performed unweighted UniFrac distance analysis (Fig 2).  
128 Microbial communities in patients with RA had distinct clusters compared to control patients  
129 without the complicating factor of periodontitis (Fig 2A, PERMANOVA,  $p < 0.01$ ). The  
130 presence of periodontitis in patients with RA obviated the difference between the RA and  
131 control group ( $P > 0.05$ , Fig 2B). However, RA patients with periodontitis clustered separately  
132 from RA patients without periodontitis ( $P < 0.05$ , Fig 2C).

133

134 **Subgingival RA and Control group sites harbor distinct bacterial communities.**

135 We performed LEFSE (linear discriminant analysis coupled with effect size  
136 measurements) for analysis of the relative abundance of microbial taxonomic groups. A number  
137 of pathogenic bacteria were significantly elevated in the RA group that are associated with  
138 worse periodontal status [1]. RA patients without periodontitis had enrichment in periodontitis-  
139 associated bacteria such as *Prevotella* species (*P. melaninogenica*, *P. denticola*, *P. histicola*, *P.*  
140 *nigrescens*, *P. oulorum*, and *P. maculosa*) and other pathogenic species (*Selenomonas noxia*, *S.*  
141 *sputigena* and *Anaeroglobus geminatus*). In addition, RA subjects presented a reduction of  
142 health-associated species (*Streptococcus*, *Rothia aeria*, *Kingella oralis*, *Haemophilus*,

143 *Actinomyces*) (Fig 3A). In the same way, pathogenic species such as *Prevotella*,  
144 *Aggregatibacter actinomycetemcomitans* and *Parvimonas micra* were significantly increased  
145 in RA patients with periodontitis compared to control subjects with periodontitis (Fig 3B).

146 We also observe an increased concentration of gram-negative anaerobic species on RA  
147 sites compared to control sites with periodontitis (S1 Fig)

#### 148 **RA parameters and oral bacteria species**

149 Some bacteria species were correlated with RA parameters. In RA subjects with  
150 periodontitis, bacteria related to periodontal health, such as *Actinomyces*, were negatively  
151 correlated with number of tender joints ( $\rho = -0.36$ ,  $p < 0.05$ ). On the other hand, in the same  
152 subjects, the presence of pathogenic species such as *Fretibacterium fastidiosum*, *Parvimonas*  
153 *micra* and *Anaeroglobus geminatus* were correlated with augmented numbers of swollen ( $\rho =$   
154  $0.35$ ) and tender joints ( $\rho = 0.30$ ),  $p < 0.05$ .

155

#### 156 **Predicted functional signatures of subgingival microbiota in RA patients**

157 Analysis using PICRUSt revealed that genes involved with energy metabolism,  
158 lipopolysaccharide (LPS) biosynthesis, amino acid and carbohydrates metabolism, cell cycle  
159 and peptidases were significantly more abundant in the subgingival metagenome of subjects  
160 with RA independent of periodontal status. In controls, genes involved with amino acid  
161 biosynthesis, and carbohydrate metabolism were overrepresented in the microbiota (S2 Fig).

162

#### 163 **Salivary concentration of inflammatory cytokines in RA patients**

164 To investigate whether the above-mentioned dysbiosis in subgingival microbiota could  
165 be associated with an altered inflammatory response we measured cytokines in saliva of RA  
166 and control subjects (Fig 4). The levels of IL-2, IL-6 and IFN- $\gamma$  were increased in saliva from  
167 RA patients compared to control subjects both without periodontitis ( $P < 0.05$ ). IL-33 and TNF- $\alpha$   
168 were increased in all RA groups independent of periodontal status ( $P < 0.05$ ). IL-17 was  
169 increased in RA subjects with periodontitis compared to control subjects ( $P < 0.05$ , Fig4).



170 The increased levels of the cytokines IL-6, IL-17 and IL-33, positively correlated with  
171 periodontal parameters such as probing depth and number of missing teeth as demonstrated in  
172 Table 2 (P<0.05). The levels of IL-33 positively correlated with RA parameters such as  
173 Rheumatoid factor and c-reactive protein (CRP), while IL-6 was positively correlated with CRP  
174 and ESR. Furthermore, the presence of healthy-related species including *Streptococcus*, *Rothia*  
175 *aeria*, *Actinomyces* was negatively correlated with cytokines IL-17 and TNF- $\alpha$ . In contrast, the  
176 presence of pathogenic species, such as *Selenomas* and *Prevotella*, were correlated with  
177 increased levels of inflammatory cytokines (IL-2, IL-6, IL-17, IL-33 and TNF- $\alpha$ ) (Table 2).  
178

**Table 2 - Correlations among inflammatory cytokines in saliva, relative abundance of bacteria, RA and Periodontal parameters in RA patients (rho values)**

|                                | IL-33 | IL-2 | TNF- $\alpha$ | IL-6 | IL-17 |
|--------------------------------|-------|------|---------------|------|-------|
| <b>RA parameters</b>           |       |      |               |      |       |
| RF                             | 0.80  | -    | -             | -    | -     |
| CRP                            | 0.60  | -    | -             | 0.32 | -     |
| ESR                            | -     | -    | -             | 0.50 | -     |
| <b>Periodontal parameters</b>  |       |      |               |      |       |
| PD (mm)                        | -     | -    | -             | -    | 0.54  |
| CAL(mm)                        | -     | -    | -             | -    | -     |
| BOP (%)                        | 0.51  | -    | -             | -    | -     |
| Missing teeth                  | -     | -    | -             | 0.35 | -     |
| <b>Bacteria</b>                |       |      |               |      |       |
| <i>Rothia aeria</i>            | -     | -    | -             | -    | -0.30 |
| <i>Streptococcus</i>           | -     | -    | -0.46         | -    | -0.35 |
| <i>Actinomyces</i>             | -     | -    | -0.45         | -    | -0.41 |
| <i>Haemophilus</i>             | -0.35 | -    | -             | -    | -     |
| <i>Selenomonas</i>             | 0.32  | -    | -             | 0.38 | -     |
| <i>Selenomonas noxia</i>       | 0.35  | -    | -             | 0.35 | -     |
| <i>Prevotella oralis</i>       | -     | 0.30 | 0.31          | 0.47 | 0.30  |
| <i>Fusobacterium nucleatum</i> | -     | -    | -             | 0.50 | 0.35  |

BOP: bleeding upon probing, PD: probing depth, CAL: clinical attachment level, CRP: C-reactive protein; IL: interleukin; ESR: Erythrocyte sedimentation rate, RF: rheumatoid factor; IL: interleukin; TNF: tumor necrosis factor. All values showed were statistically significant at value of  $p < 0.05$ , Spearman rank correlation

179

180

181

182

## 183 **Subgingival biofilm of RA patients elicited high IFN- $\gamma$ production from PBMCs**

184 To evaluate the potential of dysbiotic subgingival biofilm of RA patients to stimulate  
185 inflammatory response, we exposed PBMCs from control individuals to inactivated bacterial  
186 plaque samples from RA or healthy donors, neither of which had periodontitis. Plaque  
187 samples from RA subjects' stimulated significantly higher production of IFN- $\gamma$  compared to  
188 plaque from control subjects (Supplemental Figure 3).

189

## 190 **Discussion**

191 A relationship between RA and periodontitis has previously been reported, but the  
192 impact of RA on the subgingival microbiota linked to periodontal disease has not been  
193 thoroughly investigated and mechanisms for the potential impact have not been addressed [23–  
194 28]. In the present study, we showed significant differences in the subgingival bacterial  
195 community between RA patients and controls. RA patients had a higher bacterial load, a more  
196 diverse microbiota and increased abundance of pathogenic species compared to controls, even  
197 in periodontally healthy individuals. Accordingly, periodontal destruction (probing depth and  
198 clinical attachment loss) was significantly greater in RA subjects.

199 Microbiota homeostasis can be modulated by the host through several factors, including  
200 genetic, environmental and inflammatory [29]. Chronic systemic inflammation, as observed in  
201 RA, may affect the levels of inflammatory cytokines in periodontal tissues for instance,  
202 increased concentration of cytokines in saliva have been consistently reported for chronic  
203 inflammatory diseases such as systemic lupus erythematosus [30] and rheumatoid arthritis [31].  
204 We observed higher levels of IL-2, IFN- $\gamma$  TNF- $\alpha$ , IL-6, IL-17 and IL-33 in saliva from RA  
205 patients compared to control subjects. These cytokines have previously been demonstrated in  
206 sites of periodontal inflammation [32–34]. IL-2 and IFN- $\gamma$  are Th1 cytokines that enhance cell-  
207 mediate response [35]. TNF, IL-6 and IL-17 have multiple overlapping functions that contribute  
208 to RA and periodontal disease by mediating leukocyte activation and migration, chemokine  
209 expression and osteoclast activation [26,36]. IL-33 stimulates Th2 cells to secrete the cytokines

210 IL-4, IL-5 and IL-13. It also induces the release of TNF- $\alpha$ , IL-6 and IL-1 [32]. IFN- $\gamma$  is  
211 primarily produced by Th1 and natural killer (NK) cells, and regulates several aspects of the  
212 immune response [46]. IFN- $\gamma$ , together with cytokines such as IL-17, play a central role in the  
213 inflammatory reaction and bone resorption in periodontitis [47]. Here we found high levels of  
214 IFN- $\gamma$  in saliva of RA patients. Moreover, when PBMCs were stimulated with dental plaque  
215 from RA subjects we observed a much higher production of IFN- $\gamma$  in comparison with PBMCs  
216 exposed to dental plaques of systemically healthy individuals.

217 Previous studies have suggested that periodontitis and RA are possibly interdependent  
218 with respect to the elevated levels of pro-inflammatory molecules [37]. Inflammatory mediators  
219 found in the subgingival microenvironment may change the ecological conditions in favor to  
220 the outgrowth of pathogenic bacteria, leading to periodontal destruction [38]. Local  
221 inflammation enhanced by systemic disease may change the microbial composition toward one  
222 that is adapted to an inflammatory environment and more capable of inducing inflammation, as  
223 shown for diabetes [4]. The increased inflammation caused by RA coupled with microbial  
224 changes may amplify periodontal inflammation and explain the greater susceptibility to  
225 periodontitis that we and others have observed [39,40]. In agreement with this observation,  
226 studies in mice showed that RA induces alveolar bone loss which is linked to changes in oral  
227 microbiota of these animals [27]. Thus, the results presented here provide further support that  
228 similar events occur in humans.

229 We found that RA was associated with increased microbial load and diversity, which is  
230 consistent with previous reports that periodontitis, unlike most polymicrobial infections, is  
231 associated with increased bacterial diversity [41]. In addition, we observed that the severity of  
232 RA, reflected by the number of tender and swollen joints, was significantly correlated with the  
233 presence of pathogenic oral bacteria (i.e. *Fusobacterium nucleatum* and *Treponema socransky*).  
234 In agreement with our results Zhang et al. [11] reported that bacteria enriched in RA individuals  
235 showed positive correlations with RA parameters. However, this study did not investigate  
236 whether differences in the oral microbiota were associated with periodontitis. Another study

237 evaluated only RA patients without periodontal disease [15] and their results are in agreement  
238 with our findings as we observed that RA subjects without periodontitis harbored increased  
239 bacterial biomass. Interestingly, a general pattern of enrichment of *Prevotella* species in RA  
240 patients was noticed. This finding is quite interesting when we look at the metabolic pathways  
241 of *Prevotella* species which break down proteins and peptides into amino-acids and degrade  
242 them further to produce short-chain fatty acids, ammonia, and sulfur compounds [42]. Our  
243 analysis of predicted functions using PICRUSt confirmed an enrichment of several pathways  
244 of amino acid metabolism and peptidases in the microbiota from RA subjects. In addition, we  
245 observed overexpression of genes linked to bacterial virulence such as LPS and sporulation  
246 genes. These metabolites are able to induce tissue inflammation [43] and to promote fibroblasts  
247 apoptosis [44], contributing to periodontal destruction. In addition, periodontal inflammation  
248 can increase the secretion of gingival crevicular fluid, leading to a protein-rich environment and  
249 overgrowth of proteolytic bacteria, such as *Prevotella*, keeping the tissue destruction cycle [42].  
250 In agreement with this, we also found that RA subgingival sites had an increased concentration  
251 of gram-negative anaerobic species, that are strongly associated with proteolytic metabolism  
252 and consequently, periodontal destruction [45]. In addition, we also found higher levels of  
253 *Selenomonas noxia* and *Parvimonas micra* in RA subjects in agreement with previous findings  
254 in animal model of RA [27].

255         Recently our group reported the impact of another systemic autoimmune disease,  
256 systemic lupus erythematosus (SLE) on periodontal status and subgingival microbiota [49].  
257 Patients with SLE exhibit a higher prevalence of periodontitis, which occurs at a younger age  
258 when compared to healthy individuals. Like RA, SLE caused an increased bacterial load in  
259 subgingival sites and induced changes in the microbial composition and diversity that were  
260 linked to increased cytokines concentration on saliva (IL-6, IL-17 and IL-33), similar to the  
261 changes observed for RA patients. Together these results corroborate the hypothesis that  
262 systemic inflammatory conditions lead to dysbiosis of subgingival microbiota and increase the  
263 risk of periodontitis.

264 The limitations of our study rely on its cross-sectional design, with a single time  
265 measurement. Therefore, we are unable to answer the question whether changes in the  
266 microbiota are a cause and/or effect of the RA. Besides this, the use of different types of  
267 medications to treat RA may affect the periodontal inflammation and microbiota. It is also  
268 important to mention that the analysis of predicted functions by PICRUST is only descriptive,  
269 as the ideal method to assign metabolic functions is direct analysis by RNA sequencing.

270 In conclusion, our study is the first to demonstrate the influence of RA on subgingival  
271 microbiota considering the periodontal status of the subjects. Our findings support the concept  
272 that RA is a chronic inflammatory disease that triggers and/or aggravates the imbalance  
273 between pathogenic bacteria/health-related bacteria in subgingival biofilm thus increasing  
274 susceptibility to periodontal diseases.

275

## 276 **Methods**

### 277 **Subjects**

278 During one year we evaluated patients from the Rheumatology Outpatient Clinic of  
279 Clinics Hospital of Federal University of Minas Gerais (UFMG), Belo Horizonte, Brazil that  
280 were diagnosed with RA based on the 2010 American College of Rheumatology and EULAR  
281 classification criteria [14]. Two hundred thirty-nine patients agreed to participate, however, the  
282 study group consisted of forty-two patients based on the following inclusion criteria: no other  
283 rheumatic disease, no treatment for periodontal disease within the last 6 months, no use of  
284 orthodontic appliances, no use of antibiotics within the last 3 months, no pregnancy or lactation  
285 and the presence of at least 8 teeth. The control group consisted of 47 subjects without RA or  
286 other rheumatic diseases, that were age and gender matched with the RA group, randomly  
287 assigned from a population with demographic, social, and educational backgrounds similar to  
288 RA patients. Their medical history was obtained from an interview. Patients' medical history  
289 and medications were determined by review of medical charts. Each patient had laboratory  
290 assessments of blood levels of IgM rheumatoid factor (RF), C-reactive protein (CRP), anti-

291 citrullinated protein antibody (ACPA) and erythrocyte sedimentation rate (ESR). Periodontal  
292 status was assessed by two calibrated examiners (JDC and SMM) and the following parameters  
293 were recorded: plaque index, probing depth, clinical attachment level and bleeding on probing.  
294 Periodontitis was defined as the presence of two or more interproximal sites with probing depth  
295  $\geq 4$  mm or one site with probing depth  $\geq 5$  mm [15].

296

## 297 **Ethics Statement**

298 The subjects gave written informed consent, and the study protocol was approved by the Federal  
299 University of Minas Gerais Ethics Committee (CAAE: 03128012.0.0000.5149/2012). All  
300 patient data and subgingival samples were anonymized. For sampling of PBMCs from the blood  
301 of healthy subjects they also gave written informed consent and their data were anonymized.

302

## 303 **Subgingival samples collection**

304 Subgingival samples were collected using endodontic paper points (ISO40) (Tanariman,  
305 Manacapuru, AM, Brazil) that were inserted in 5 sites with deepest probing depth for one  
306 minute. After removal, the material was pooled together and stored in a sterile tube containing  
307 500  $\mu$ L of sterile distilled water and centrifuged at 3,000 g for 5 minutes. The paper points were  
308 discharged, and the pellet was kept at  $-80^{\circ}\text{C}$  until DNA extraction.

309

## 310 **Saliva collection**

311 Saliva was collected by continuous drooling into a sterile 50 mL tube for 5 minutes. The  
312 salivary flow was measured in milliliters per minute (ml/min). The saliva samples were diluted  
313 (1:1) in a phosphate-buffered saline (PBS) solution containing protease inhibitors and  
314 subsequently frozen at  $-80^{\circ}\text{C}$  until analysis.

315

## 316 **Cytokines measurement**

317 Concentrations of interleukin-2 (IL-2), IL-6, IL-17, tumor necrosis factor- $\alpha$  (TNF- $\alpha$  and  
318 interferon- $\gamma$  (IFN- $\gamma$ ) in saliva were determined using a Cytokine Bead Array (CBA) Human  
319 Th1/Th2/Th17 Kit (BD Biosciences, San Diego, CA) and analyzed on a BD FACS Calibur flow  
320 cytometer (BD Biosciences). The concentration of IL-33 was measured by enzyme-linked  
321 immunosorbent assay (ELISA) (R&D Systems, Minneapolis, MN, USA). Assays were  
322 performed according to the manufacturer's instructions. The results were expressed as  
323 picograms of cytokine (pg/ml) adjusted according to salivary flow.

324

### 325 **DNA Extraction and Sequencing**

326 DNA was extracted from plaque samples using the Quick-g DNA MicroPrep kit (Zymo  
327 Research, Irvine, CA, USA) and 50  $\mu$ L (10 mg/ml) of lysozyme per sample to enhance bacterial  
328 lysis as described [16]. The quantity and quality of DNA was measured spectrophotometrically  
329 (Tecan, Männedorf, Switzerland). The primers 515F (5' -GTGCCAGCMGCCGCGGTAA-3')  
330 and 806R (5' -GGACTACHVGGGTWTCTAAT- 3' ) which target the hypervariable V4  
331 region of the 16S rRNA gene were used for amplification [17]. After, agarose gel  
332 electrophoresis was performed to check size integrity. All amplicons were subjected to Illumina  
333 MiSeq Platform at the Next-Generation Sequencing Core of University of Pennsylvania and  
334 sequenced together at the same run. All Illumina sequence data were submitted to the NCBI  
335 Sequence Read Archive (SRA) under BioProject accession number PRJNA325500.

336

### 337 **Microbiota Analysis**

338 The raw reads were trimmed to remove regions with a low Phred score. Trimmomatic  
339 [18] was the tool used with the TRAILING:5 and SLIDINGWINDOW:4:15 parameters. The  
340 trimmed reads were merged using FLASH [19] tool requiring 30 reads overlap. The assembled  
341 amplicons were mapped to the CORE database using the Qiime's pick\_closed\_reference\_otus  
342 and 97% identity threshold. The representative set of sequences had their taxonomic  
343 classification using the same database and the Qiime's assign\_taxonomy script. The alpha



344 diversity indexes were assessed using the Vegan R package [20]. Beta diversity was calculated  
345 using Unique Fraction metric (UNIFRAC) unweighted. Quantification of total bacterial load  
346 was determined by real-time PCR using universal primers for 16S rRNA gene. (F:  
347 AGAGTTTGATCCTGGCTCAG; R: ACGGCTACCTTGTTACGACTT) (IDT, Coralville,  
348 Iowa, USA) based on a standard curve prepared using DNA extracted from a known number  
349 of *Porphyromonas gingivalis* (colony forming units) separated with flow cytometry and  
350 amplified with the same qPCR protocol. Samples were assayed in duplicate in a 25 µl reaction  
351 mixture containing 2.5 µl of template DNA, 2.5 µl of 10x TaqMan Universal PCR Master Mix,  
352 1.5 µl of MgCl<sub>2</sub>, 1 µl dNTP, 12.5 pmol of forward primer and reverse primer. The standard  
353 curve was used to derive the Cq (quantification cycle value) vs log CFUs linear equation. The  
354 cycling conditions used were as follows: 95 °C for 10 min, followed by 40 cycles at 95 °C for  
355 15 s and 60 °C for 1 min each.

356 To provide an inference of the functional profile of the microbial community based on  
357 16S rRNA gene sequence results we assigned taxonomy to the representative set of sequences  
358 using the GreenGenes 13.5 database. This classification was utilized by PICRUSt (phylogenetic  
359 investigation of communities by reconstruction of unobserved states) to identify and quantify  
360 the Pathways and KEGG Orthology Groups.

361

### 362 **Blood collection and in vitro induction of PBMCs with oral biofilm**

363 Blood was obtained from 5 systemically healthy individuals that did not have  
364 periodontitis or current use of immunosuppressive or anti-inflammatory drugs. Peripheral blood  
365 mononuclear cells (PBMCs) isolated by Ficoll–Paque gradient (Amersham Biosciences,  
366 Uppsala, Sweden) for 40 minutes at 20°C. PBMCs were washed twice with PBS and counted  
367 in a hemocytometer chamber. The PBMCs of each patient (10<sup>6</sup> cells/ml) were incubated in a  
368 complete RPMI medium of 2 mM L-glutamine, 5% normal human serum, 100 I g/mL  
369 streptomycin, and 100 UI/mL penicillin G potassium with subgingival plaque in 96-well plates.  
370 For these assays total subgingival plaque was removed from a given site, placed in 100 ul of

371 TE buffer, homogenized by vortexing and heat/freeze inactivated. PBMCs were exposed to a  
372 standardized amount of bacteria ( $1 \times 10^8$  CFU) for 24 h and then supernatants were processed to  
373 evaluate cytokine concentration.

374

375

## 376 **Statistics**

377 After evaluating the normality of distribution by Kolmogorov-Smirnov tests, clinical,  
378 demographic, alpha diversity, cytokine levels and bacterial load data were compared using One  
379 Way ANOVA or Kruskal-Wallis test. Correlations between relative abundance of taxa and  
380 clinical parameters of periodontal disease and RA were calculated using Spearman correlation  
381 coefficients (SPSS software, version 20). PERMANOVA was performed to compare beta  
382 diversity (QIIME software, version 1.9). In case of multiple comparisons, the p-value was  
383 corrected using Bonferroni correction. The predicted functional groups, and Operational  
384 Taxonomic Units (OTU), were compared among RA and control subjects and tested for  
385 statistical significance using DESeq2 [21] (R statistical software, version 3.5) and LEFSE [22],  
386 respectively. P values  $< 0.05$  were statistically significant.

387

## 388 **Data reporting**

389 All Illumina sequence data from this study were submitted to the NCBI Sequence Read Archive  
390 (SRA) under BioProject accession number PRJNA325500.

391

## 392 **Acknowledgements**

393 We thank Professor Dr. Paulo Eduardo Alencar de Souza for his contribution with in vitro  
394 experiment.

## 395 **References**

- 396 1. Diaz PI, Hoare A, Hong B. Subgingival Microbiome Shifts and Community Dynamics  
397 in Periodontal Diseases. *J Calif Dent Assoc.* 2016;44(7):397–472.
- 398 2. Graves DT, Jiang Y, Genco C. Periodontal disease: bacterial virulence factors, host  
399 response and impact on systemic health. *Curr Opin Infect Dis.* 2000 Jun;13(3):227–32.
- 400 3. Hajishengallis G. Periodontitis : from microbial immune subversion to systemic  
401 inflammation. *Nat Rev Immunol.* 2015;15(1):30–44.
- 402 4. Xiao E, Mattos M, Albiero ML, Bittinger K, Graves DT, Chen S. Diabetes Enhances  
403 IL-17 Expression and Alters the Oral Microbiome to Increase Its Pathogenicity. *Cell*  
404 *Host Microbe.* 2017;22:120–8.
- 405 5. Koch AE. The pathogenesis of rheumatoid arthritis. *N Engl J Med.* 2007;36:5–8.
- 406 6. Demmer RT, Molitor JA, Jacobs Jr DR, Michalowicz BS. Periodontal disease, tooth  
407 loss and incident rheumatoid arthritis: results from the First National Health and  
408 Nutrition Examination Survey and its epidemiological follow-up study. *J Clin*  
409 *Periodontol.* 2011;38(11):998–1006.
- 410 7. Okada M, Kobayashi T, Ito S, Tomoko Y, Abe A, Murasawa A, et al. Periodontal  
411 Treatment Decreases Levels of Antibodies to Porphyromonas Gingivalis and Citrulline  
412 in Patients With Rheumatoid Arthritis and Periodontitis. *J Periodontol.*  
413 2013;84(12):74–84.
- 414 8. Bright R, Thiele GM, Manavis J, Mikuls TR, Payne JB, Bartold PM. Gingival tissue,  
415 an extrasynovial source of malondialdehyde-acetaldehyde adducts, citrullinated and  
416 carbamylated proteins. *J Periodontal Res.* 2017 Oct 17;
- 417 9. Queiroz-Junior CM, Madeira MFM, Coelho FM, de Oliveira CR, Candido LCM,  
418 Garlet GP, et al. Experimental arthritis exacerbates Aggregatibacter  
419 actinomycetemcomitans-induced periodontitis in mice. *J Clin Periodontol.* 2012  
420 Jul;39(7):608–16.
- 421 10. Scher JU, Ubeda C, Equinda M, Khanin R, Buischi Y, Viale A, et al. Periodontal

- 422 disease and the oral microbiota in new-onset rheumatoid arthritis. *Arthritis Rheum.*  
423 2012;64(10):3083–94.
- 424 11. Zhang X, Zhang D, Jia H, Feng Q, Wang D, Liang D, et al. The oral and gut  
425 microbiomes are perturbed in rheumatoid arthritis and partly normalized after  
426 treatment. *Nat Med.* 2015;21(8):895–905.
- 427 12. Mikuls TR, Walker C, Qiu F, Yu F, Thiele GM, Alfant B, et al. The subgingival  
428 microbiome in patients with established rheumatoid arthritis. *Rheumatology [Internet].*  
429 2018;(March). Available from: [https://academic.oup.com/rheumatology/advance-](https://academic.oup.com/rheumatology/advance-article/doi/10.1093/rheumatology/key052/4943961)  
430 [article/doi/10.1093/rheumatology/key052/4943961](https://academic.oup.com/rheumatology/advance-article/doi/10.1093/rheumatology/key052/4943961)
- 431 13. Lopez-Oliva I, Paropkari AD, Saraswat S, Serban S, Yonel Z, Sharma P, et al.  
432 Dysbiotic Subgingival Microbial Communities in Periodontally Healthy Patients With  
433 Rheumatoid Arthritis. *Arthritis Rheumatol.* 2018;70(7):1008–13.
- 434 14. Aletaha D, Neogi T, Silman AJ, Funovits J, Felson DT, Bingham CO, et al. 2010  
435 Rheumatoid arthritis classification criteria: An American College of  
436 Rheumatology/European League Against Rheumatism collaborative initiative. *Arthritis*  
437 *Rheum.* 2010 Sep;62(9):2569–81.
- 438 15. Eke PI, Page RC, Wei L, Thornton-Evans G, Genco RJ. Update of the Case Definitions  
439 for Population-Based Surveillance of Periodontitis. *J Periodontol.* 2012;83(12):1449–  
440 54.
- 441 16. Grice E a, Snitkin ES, Yockey LJ, Bermudez DM, Liechty KW, Segre J a.  
442 Longitudinal shift in diabetic wound microbiota correlates with prolonged skin defense  
443 response. *Proc Natl Acad Sci U S A.* 2010 Aug 17;107(33):14799–804.
- 444 17. Caporaso JG, Lauber CL, Walters W a, Berg-Lyons D, Huntley J, Fierer N, et al. Ultra-  
445 high-throughput microbial community analysis on the Illumina HiSeq and MiSeq  
446 platforms. *ISME J.* 2012 Aug;6:1621–4.
- 447 18. Bolger AM, Lohse M, Usadel B. Trimmomatic: A flexible trimmer for Illumina  
448 sequence data. *Bioinformatics.* 2014;30(15):2114–20.

- 449 19. Magoc T, Salzberg SL. FLASH: fast length adjustment of short reads to improve  
450 genome assemblies. *Bioinformatics*. 2011;27(21):2957–63.
- 451 20. Dixon P. VEGAN, a package of R functions for community ecology. *J Veg Sci*.  
452 2003;14(6):927–30.
- 453 21. Love MI, Huber W, Anders S. Moderated estimation of fold change and dispersion for  
454 RNA-seq data with DESeq2. *Genome Biol*. 2014;15(12):550.
- 455 22. Segata N, Izard J, Waldron L, Gevers D, Miropolsky L, Garrett WS, et al.  
456 Metagenomic biomarker discovery and explanation. *Genome Biol*. 2011;12(6):R60.
- 457 23. Mercado FB, Marshall RI, Bartold P. Inter-relationships between rheumatoid arthritis  
458 and periodontal disease. A review. *J Clin Periodontol*. 2003;30(9):761–72.
- 459 24. de Pablo P, Chapple ILC, Buckley CD, Dietrich T, P de P, IL C, et al. Periodontitis in  
460 systemic rheumatic diseases. *Nat Rev Rheumatol*. 2009;5(4):218–24.
- 461 25. JG R, JD G, Goules A, Charalampakis G, Pikazis D. Autopathogenic correlation of  
462 periodontitis and rheumatoid arthritis. *Rheumatol*. 50(7):1189–93.
- 463 26. Queiroz-Junior CM, Madeira MFM, Coelho FM, Costa VV, Bessoni RLC, Sousa  
464 LFDC, et al. Experimental arthritis triggers periodontal disease in mice: involvement of  
465 TNF- $\alpha$  and the oral Microbiota. *J Immunol*. 2011;187(7):3821–30.
- 466 27. Corrêa JD, Saraiva AM, Queiroz-Junior CM, Madeira MFM, Duarte PM, Teixeira  
467 MM, et al. Arthritis-induced alveolar bone loss is associated with changes in the  
468 composition of oral microbiota. *Anaerobe*. 2016;39:91–6.
- 469 28. Scher JU, Abramson SB. The microbiome and rheumatoid arthritis. *Nat Rev*  
470 *Rheumatol*. 2011;7(10):569–78.
- 471 29. Molloy S. Microbiome: Tipping the balance. *Nat Rev Microbiol*. 2012;10(1):3.
- 472 30. Marques CPC, Victor EC, Franco MM, Fernandes JMC, Maor Y, de Andrade MS, et  
473 al. Salivary levels of inflammatory cytokines and their association to periodontal  
474 disease in systemic lupus erythematosus patients. A case-control study. *Cytokine*.  
475 2016;85:165–70.

- 476 31. Mirrieles J, Crofford L, Pugh L, Kryscio R, Dawson D, Ebersole J, et al.  
477 Rheumatoid arthritis and salivary biomarkers of periodontal disease. *J Clin*  
478 *Periodontol.* 2010;37:1068–74.
- 479 32. Köseoğlu S, Hatipoğlu M, Sağlam M, Enhoş Ş, Esen HH. Interleukin-33 could play an  
480 important role in the pathogenesis of periodontitis. *J Periodontal Res.* 2015  
481 Aug;50(4):525–34.
- 482 33. Garlet GP. Destructive and Protective Roles of Cytokines in Periodontitis : A Re-  
483 appraisal from Host Defense and Tissue Destruction Viewpoints. *Crit Rev Oral Biol*  
484 *Med.* 2010;89(12):1349–63.
- 485 34. Graves D. Cytokines that promote periodontal tissue destruction. *J Periodontol.*  
486 2008;79(8 Suppl):1585–91.
- 487 35. Gemmell E, Marshall RI, Seymour GJ. Cytokines and prostaglandins in immune  
488 homeostasis and tissue destruction in periodontal disease. *Periodontol 2000.* 1997  
489 Jun;14(296):112–43.
- 490 36. McInnes IB, Buckley CD, Isaacs JD. Cytokines in rheumatoid arthritis - shaping the  
491 immunological landscape. *Nat Rev Rheumatol.* 2016;12(1):63–8.
- 492 37. Biyikoglu B, Buduneli N, Aksu K, Nalbantsoy A, Lappin DF, Evrenosoglu E, et al.  
493 Periodontal therapy in chronic periodontitis lowers gingival crevicular fluid  
494 interleukin-1beta and DAS28 in rheumatoid arthritis patients. *Rheumatol Int.*  
495 2013;33:2607–16.
- 496 38. Hajishengallis G. The inflammophilic character of the periodontitis-associated  
497 microbiota. *Mol Oral Microbiol.* 2014;29(6):248–57.
- 498 39. Smit M De, Westra J, Vissink A, Doornbos-van der Meer B, Brouwer E, van  
499 Winkelhoff AJ. Periodontitis in established rheumatoid arthritis patients: a cross-  
500 sectional clinical, microbiological and serological study. *Arthritis Res Ther.*  
501 2012;14(5):R222.
- 502 40. Bingham III CO, Moni M. Periodontal disease and rheumatoid arthritis: the evidence

- 503 accumulates for complex pathobiologic interactions. *Curr Opin Rheumatol.*  
504 2013;25:345–53.
- 505 41. Diaz PI, Dupuy AK, Abusleme L, Reese B, Obergfell C, Choquette L, et al. Using high  
506 throughput sequencing to explore the biodiversity in oral bacterial communities. *Mol*  
507 *Oral Microbiol.* 2012;27(3):180–201.
- 508 42. Takahashi N. Oral Microbiome Metabolism: From “Who Are They?” to “What Are  
509 They Doing?” *J Dent Res.* 2015;94(12):1628–37.
- 510 43. Niederman R, Buyle-Bodin Y, Lu Y, Robinson P, Naleway C. Short-chain carboxylic  
511 acid concentration in human gingival crevicular fluid. *J Dent Res.* 1997;76(1):575–9.
- 512 44. Kurita-Ochiai T, Seto S, Suzuk N, Yamamoto M, Otsuka K, Abe K, et al. Butyric Acid  
513 Induces Apoptosis in Inflamed Fibroblasts. *J Dent Res.* 2008;87(1):51–5.
- 514 45. Marsh PD, Head DA, Devine DA. Ecological approaches to oral biofilms: Control  
515 without killing. *Caries Res.* 2015;49(suppl 1):46–54.
- 516 46. Ebersole JL, Kirakodu S, Novak MJ, Stromberg AJ, Shen S, Orraca L, et al. Cytokine  
517 gene expression profiles during initiation, progression and resolution of periodontitis. *J*  
518 *Clin Periodontol.* 2014;41(9):853–61.
- 519 47. Andrukhov O, Ulm C, Reischl H, Nguyen PQ, Matejka M, Rausch-Fan X. Serum  
520 cytokine levels in periodontitis patients in relation to the bacterial load. *J Periodontol.*  
521 2011 Jun;82(6):885–92.
- 522 48. Kobayashi T, Murasawa A, Komatsu Y, Yokoyama T, Ishida K, Abe A, et al. Serum  
523 cytokine and periodontal profiles in relation to disease activity of rheumatoid arthritis  
524 in Japanese adults. *J Periodontol.* 81(5):650–7.
- 525 49. Corrêa JD, Calderaro DCDC, Ferreira GA, Mendonça SMS, Fernandes GR, Xiao E, et  
526 al. Subgingival microbiota dysbiosis in systemic lupus erythematosus: association with  
527 periodontal status. *Microbiome.* 2017;5(1):34.
- 528  
529

530 **Figure Captions**

531 **Figure 1- Bacterial load and microbial diversity in subgingival biofilm samples.** A)

532 bacterial load, B, C and D) metrics of alpha diversity in Control subjects and RA patients with  
533 or without periodontitis. \*Statistically different compared to Non-Periodontitis subjects within  
534 the same group. #statistically different compared to Controls.  $p < 0.05$ , Kruskal-Wallis

535

536 **Figure 2 – Principal coordinates analysis plot showing the comparison of subgingival**

537 **microbial community composition.** Each point represents a subject. (A) Microbial  
538 communities in Control and RA subjects without periodontitis. (w/o P). (B) Microbial  
539 communities in RA patients versus Control subjects with periodontitis (w/P). (C) Microbial  
540 communities in RA patients without periodontitis versus with periodontitis.

541

542 **Figure 3 - OTUs with different relative abundance based on LEfSe results in Control subjects**

543 (Red) and RA patients (Green) without (A) and with periodontitis (B). Bars represent linear  
544 discriminant analysis scores (LDA).

545

546 **Figure 4 – Levels of inflammatory cytokines in saliva.** Control subjects and patients with

547 Rheumatoid Arthritis (RA) with and without periodontitis, determined by ELISA and CBA.

548 \*Statistically different compared to Non-Periodontitis subjects within the same group.

549 #Statistically different compared to Control.  $p < 0.05$ , Kruskal-Wallis

550

551 **Supporting information**

552 **S1 Fig. – Relative abundance (%) of microbiota composition.** Gram status and oxygen

553 metabolism of subgingival microbiota in RA patients and Control subjects, without and with  
554 periodontitis.

555



556 **S2 Fig - Differentially abundant gene functions in subgingival microbiota.** Control and  
557 RA subjects without (A) and with periodontitis (B). Functional categories of genes of the  
558 subgingival metagenome were predicted by using PICRUSt, and differentially abundant  
559 functions were then identified by using linear discriminant analysis (LDA) coupled with  
560 effect size measurements (LEfSe).

561

562 **S3 Fig - Immunostimulatory potential of dental plaque from RA patients.** Exposure of  
563 human PBMCs to RA microbial plaque. Levels of IFN- $\gamma$  was determined by ELISA.

564 \*statistically different compared to Control.  $p < 0.05$ , Student t-test.

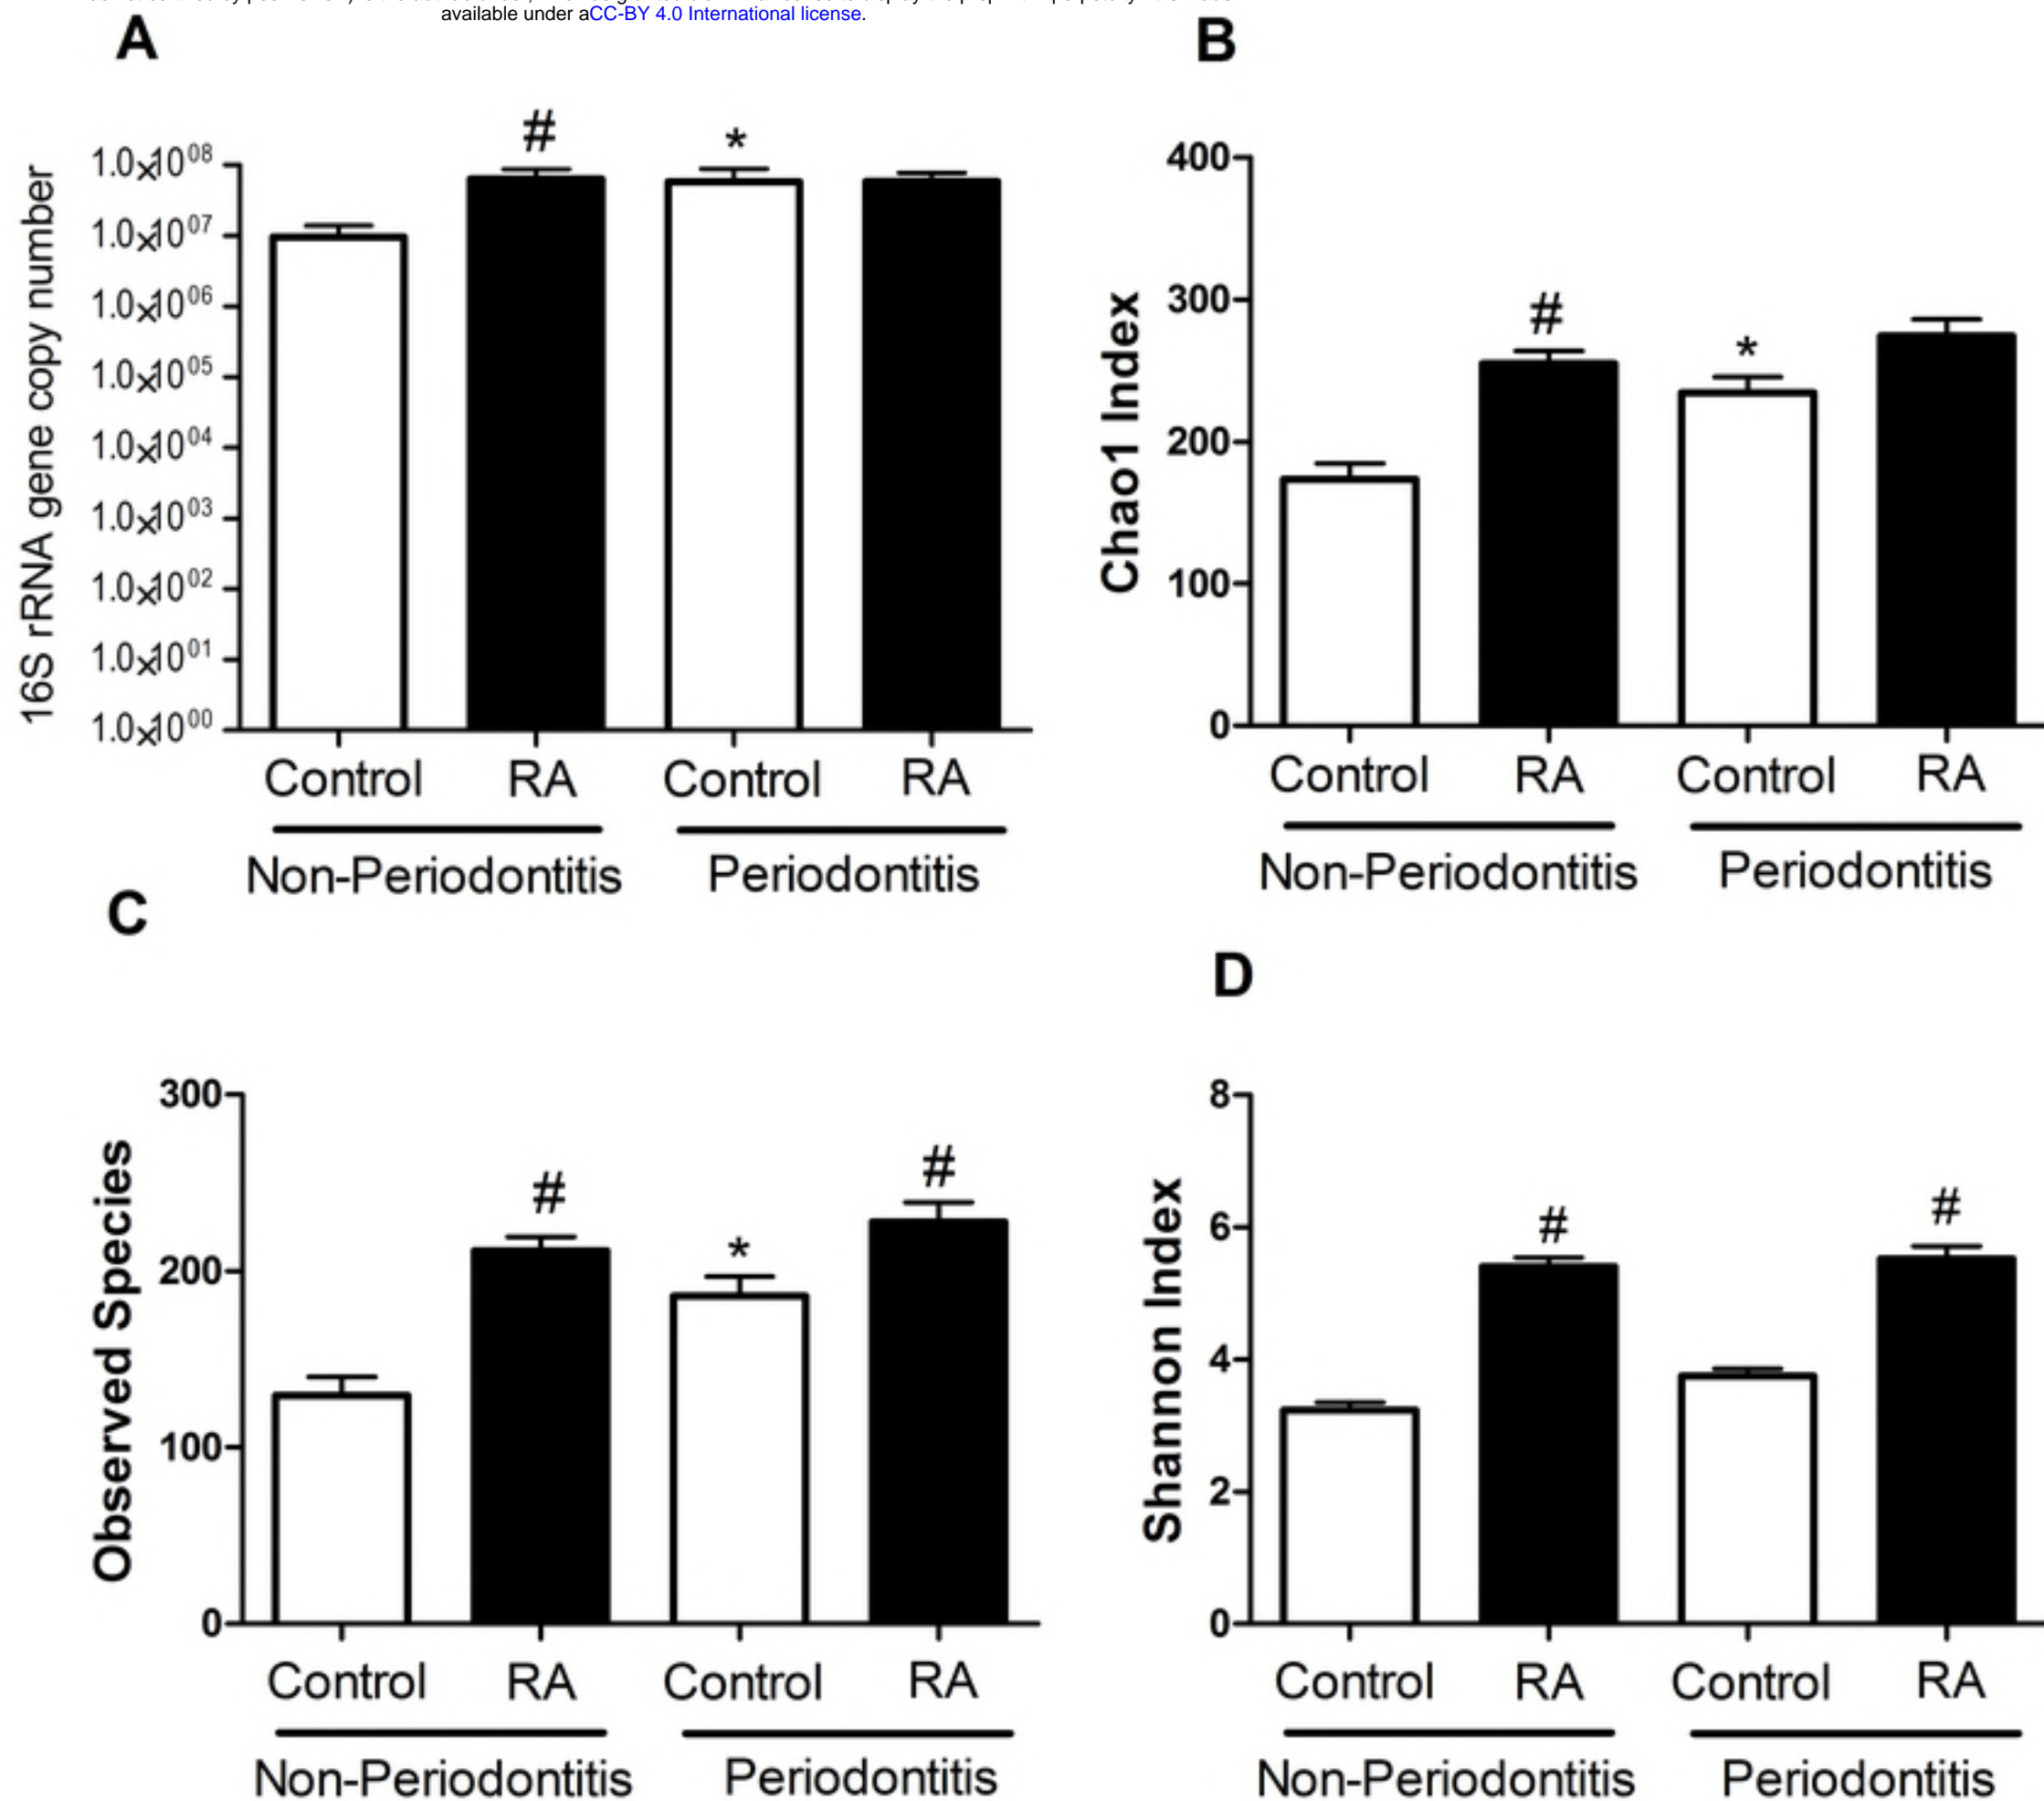

Figure 1

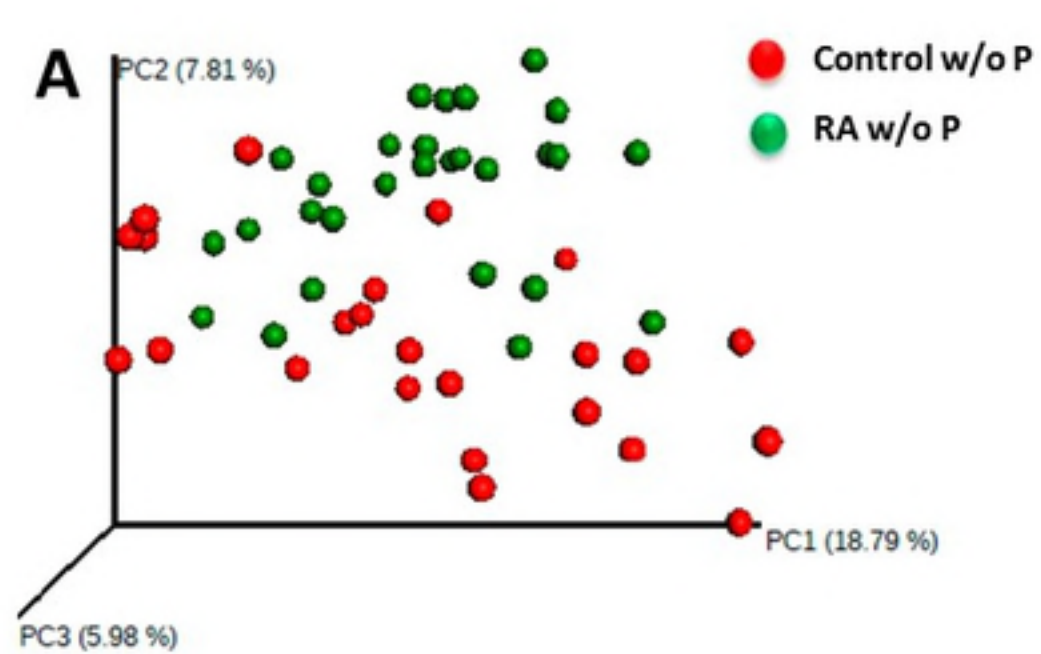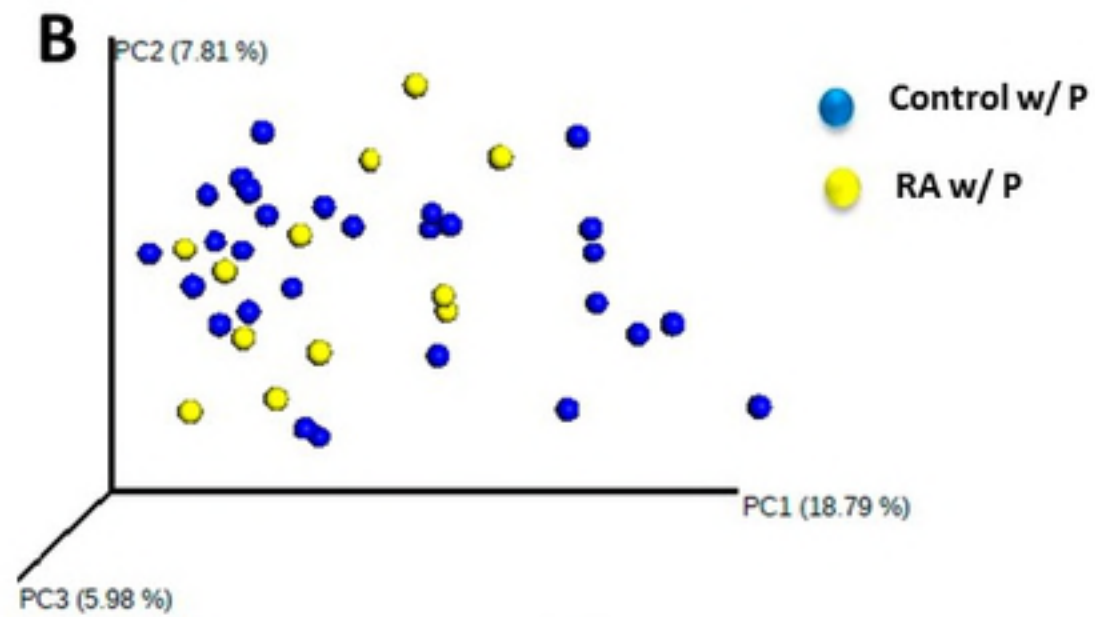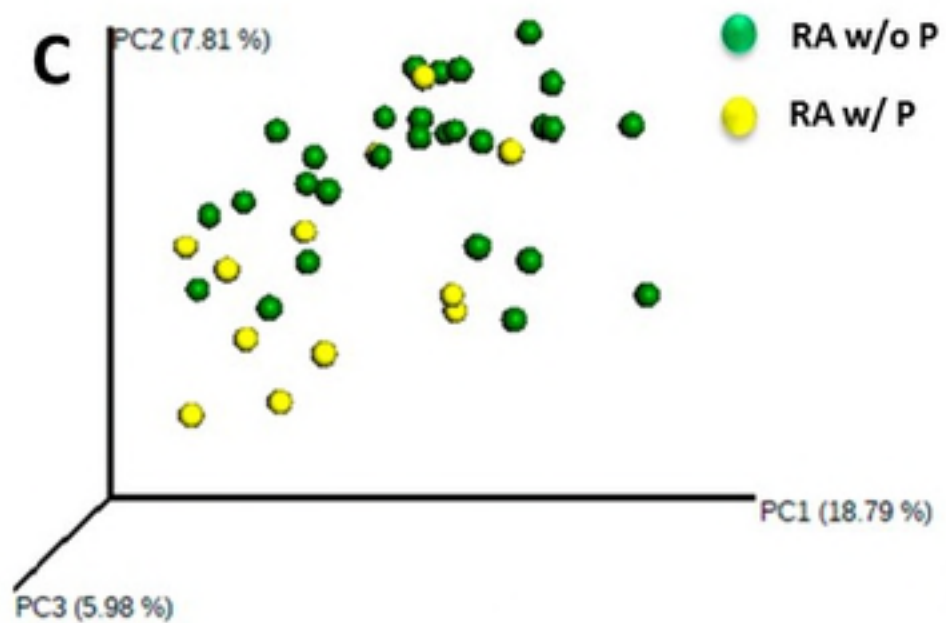

Fig2

CONTROL RA

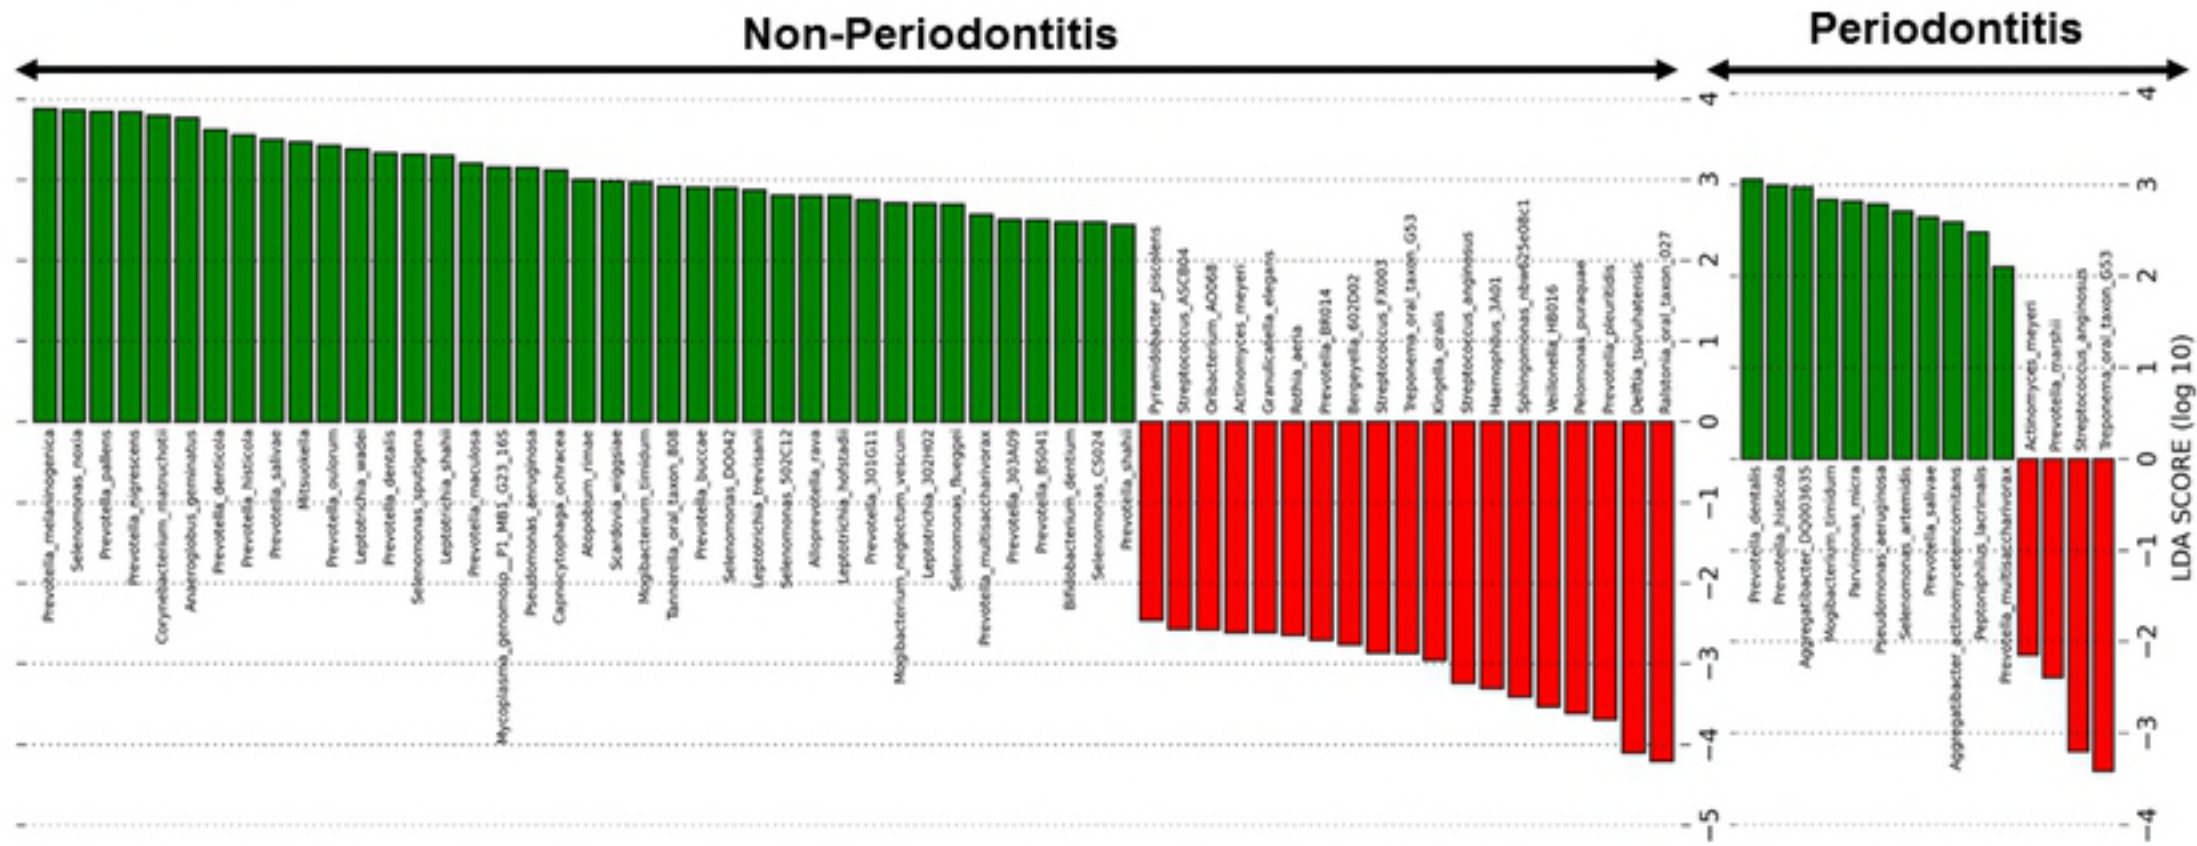

Fig3

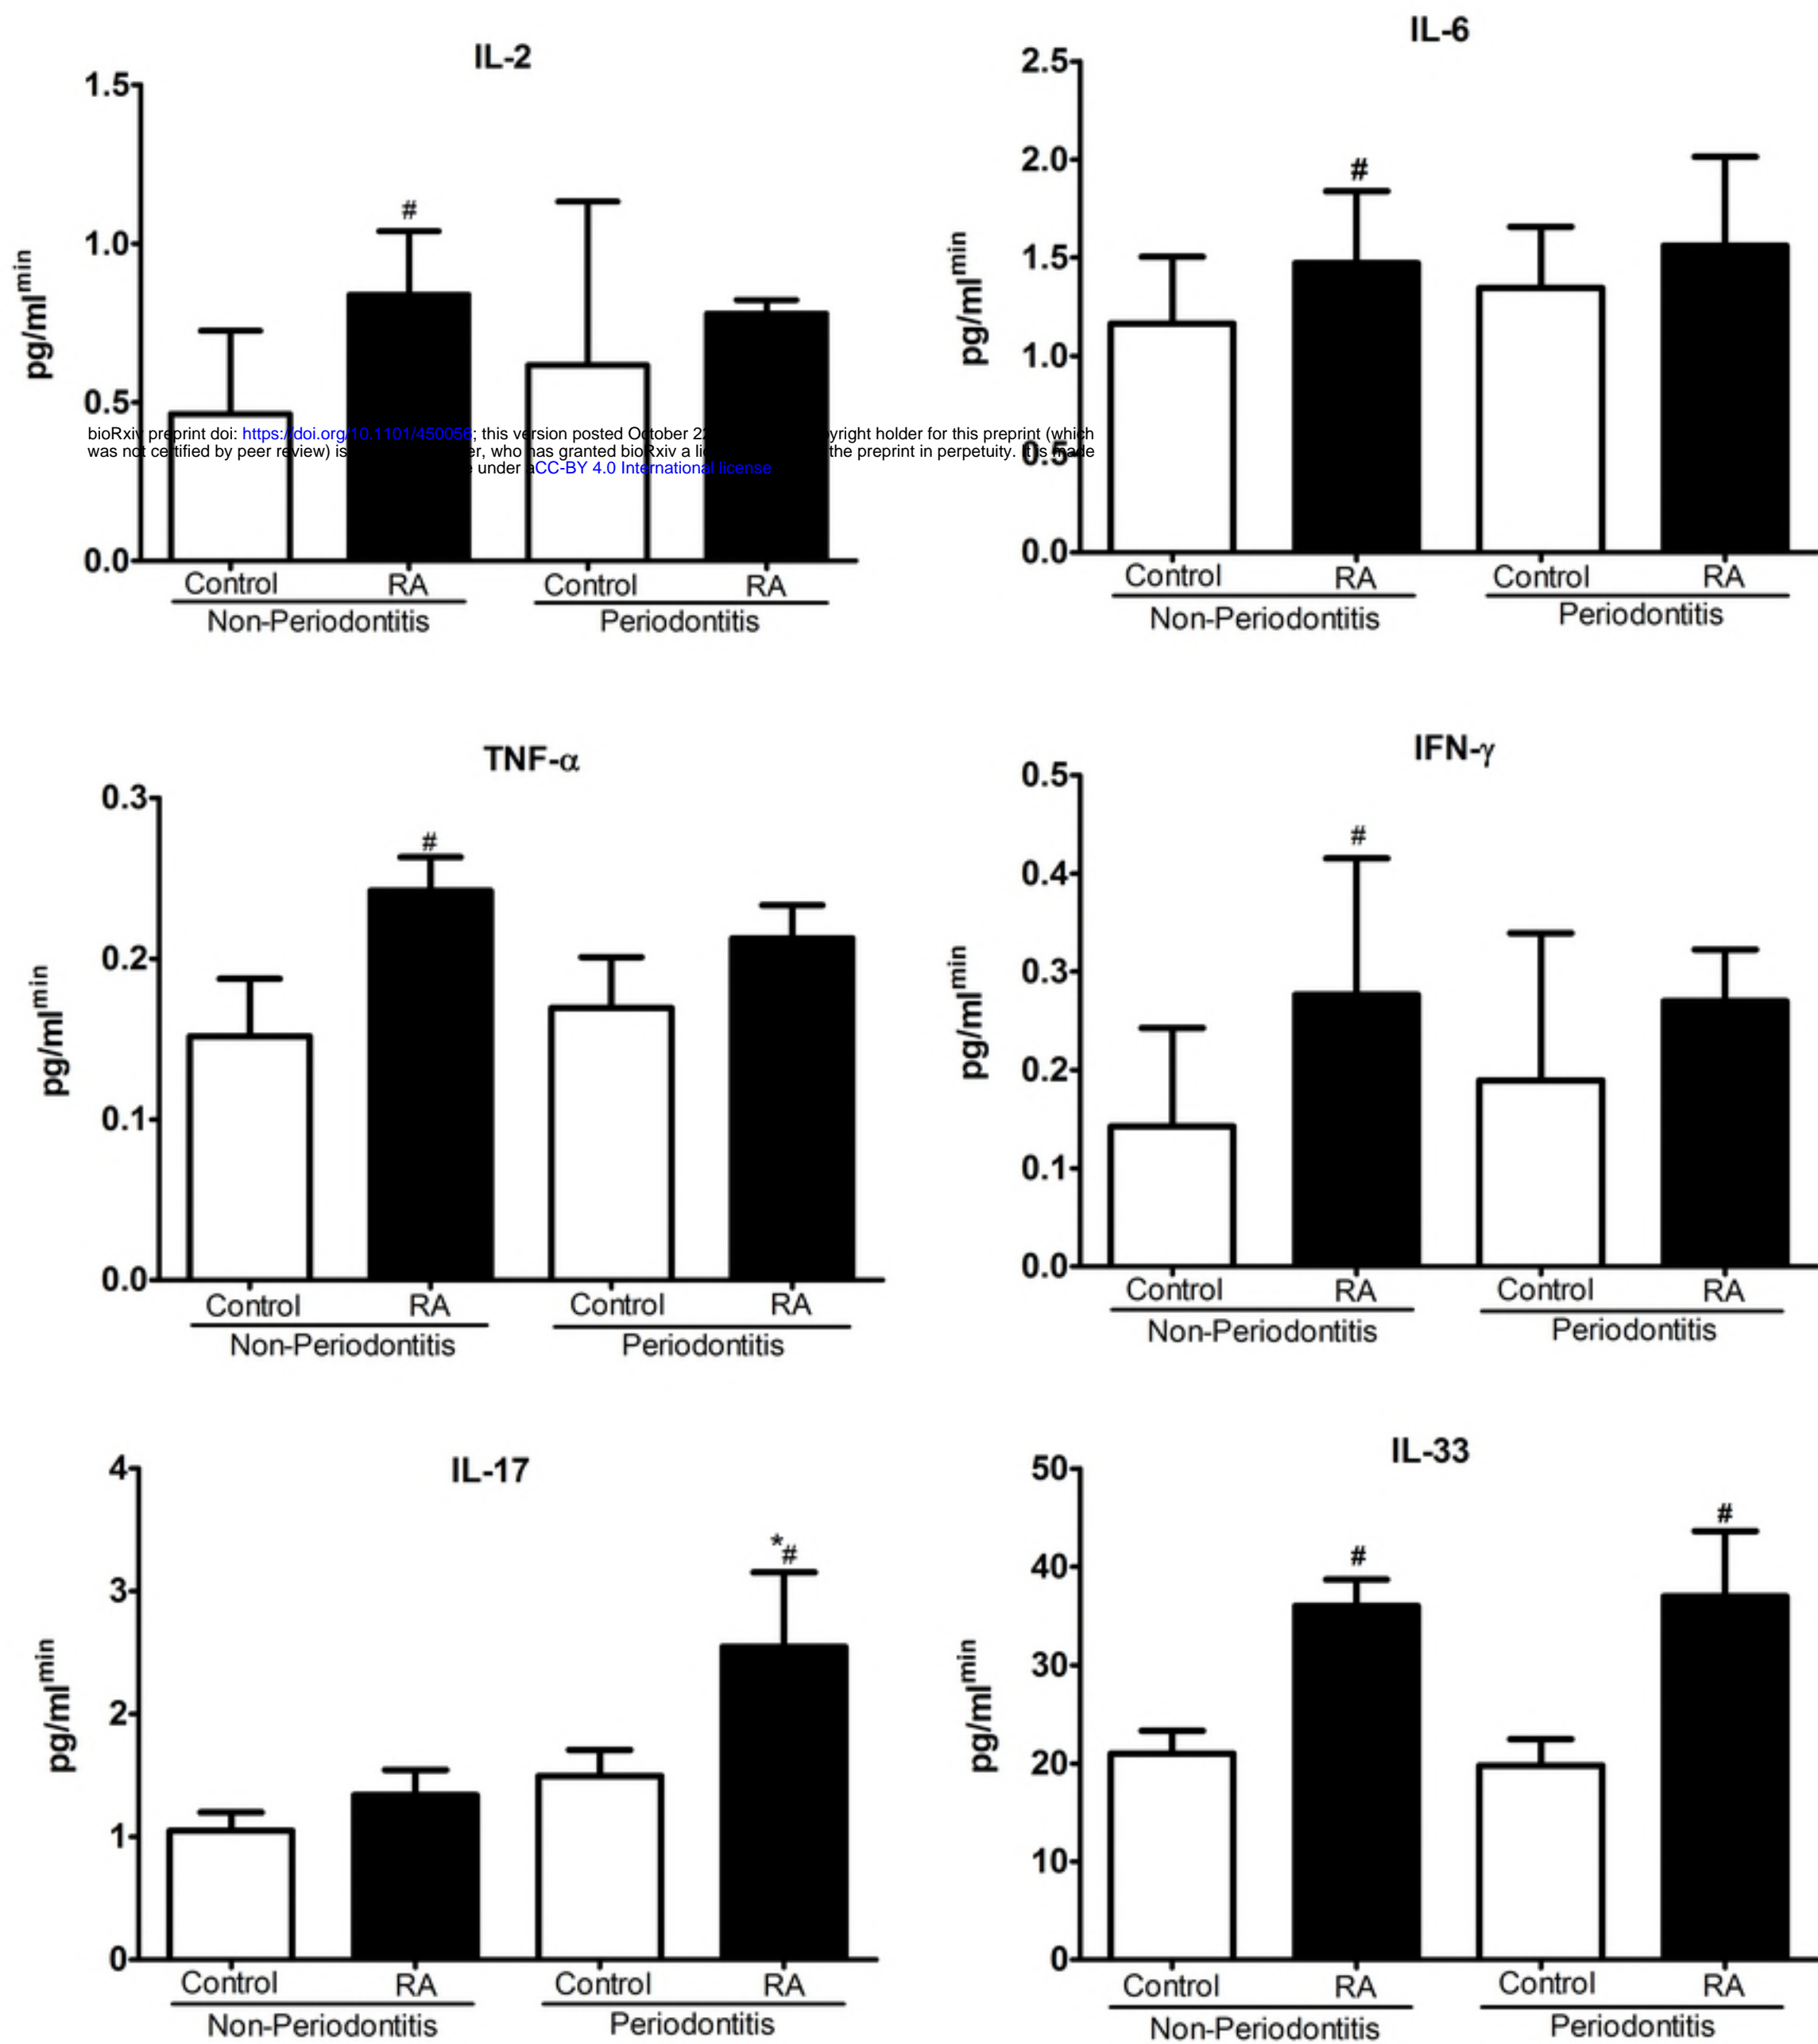

Fig4
